# Supplementary material
Source: ML conference proceedings conference paper supplement (https://www.ecva.net/papers/eccv_2020/papers_ECCV/html/123680188_ECCV_2020_paper.php)
Supplement: Supplementary file 2 [file 123680188-supp.zip]

Archive with 4 entries (3 files):
- 4272-supp/
- 4272-supp/4272-supp.pdf
- 4272-supp/Video_lego.mp4
- 4272-supp/Video_plant.mp4
